# Supplementary material
Source: PubMed Central journal article supplement (PMC524914)
Supplement: jbacter_186_22_7481__1.pdf [file jbacter_186_22_7481__1.pdf]

## Supplemental material

**Table S1. *Salmonella enterica* serovar Typhimurium strains and plasmids used**

| Bacterial strain<br>or plasmid | Description                                                           | Source or<br>reference |
|--------------------------------|-----------------------------------------------------------------------|------------------------|
| <i>S. typhimurium</i>          |                                                                       |                        |
| SL1344                         | <i>hisG46, rpsL</i> , parental virulent isolate                       | (4)                    |
| SV4450                         | SL1344 <i>igaA1</i>                                                   | (1)                    |
| SV4254                         | SL1344 <i>igaA1 zhf-6311::Tn10dTet</i>                                | (2)                    |
| EG11624                        | SL1344 <i>pmrA1::cat</i>                                              | E.A.Groisman           |
| SV4406                         | SL1344 <i>rscB70::Tn10dCm</i>                                         | (1)                    |
| SV4380                         | SL1344 <i>rscC51::MudQ</i>                                            | (1)                    |
| SV4379                         | SL1344 <i>rscA51::MudQ</i>                                            | (1)                    |
| SV4056                         | SL1344 <i>phoP7953::Tn10</i>                                          | (2)                    |
| EG5170                         | SL1344 <i>phoP5170::MudJ</i>                                          | E.A.Groisman           |
| MD0934                         | SL1344 <i>rpoS::cat</i>                                               | This work              |
| SMS438                         | SL1344 <i>rpoS::Ω-Amp<sup>r</sup></i>                                 | (7)                    |
| MD0450                         | SL1344 <i>igaA1 phoP7953::Tn10</i>                                    | This work              |
| MD0448                         | SL1344 <i>igaA1 zhf-6311::Tn10dTet pmrA::cat</i>                      | This work              |
| SV4402                         | SL1344 <i>igaA1 zhf-6311::Tn10dTet rscB70::Tn10dCm</i>                | (1)                    |
| MD0914                         | SL1344 <i>igaA1 zhf-6311::Tn10dTet phoP7953::Tn10 rscB70::Tn10dCm</i> | This work              |
| EG11554                        | SL1344 <i>mgtA9226::MudJ</i>                                          | E.A.Groisman           |
| MD0050                         | SL1344 <i>igaA1 zhf-6311::Tn10dTet mgtA9226::MudJ</i>                 | This work              |

|         |                                                                               |              |
|---------|-------------------------------------------------------------------------------|--------------|
| MD0908  | SL1344 <i>igaA1 zhf-6311::Tn10dTet rcsB70::Tn10dCm mgtA9226::MudJ</i>         | This work    |
| MD0909  | SL1344 <i>igaA1 zhf-6311::Tn10dTet rcsA51::MudQ mgtA9226::MudJ</i>            | This work    |
| MD0400  | SL1344 <i>phoP7953::Tn10 mgtA9226::MudJ</i>                                   | This work    |
| MD0932  | SL1344 <i>rpoS::Ω-Amp<sup>r</sup> mgtA9226::MudJ</i>                          | This work    |
| MD0922  | SL1344 <i>igaA1 zhf-6311::Tn10dTet rpoS::Ω-Amp<sup>r</sup> mgtA9226::MudJ</i> | This work    |
| EG11556 | SL1344 <i>ugd-9228::MudJ</i>                                                  | E.A.Groisman |
| MD0436  | SL1344 <i>igaA1 zhf-6311::Tn10dTet ugd-9228::MudJ</i>                         | This work    |
| MD0440  | SL1344 <i>rcsC51::MudQ ugd-9228::MudJ</i>                                     | This work    |
| MD0442  | SL1344 <i>igaA1 zhf-6311::Tn10dTet rcsC51::MudQ ugd-9228::MudJ</i>            | This work    |
| MD0444  | SL1344 <i>rcsB70::Tn10dCm ugd-9228::MudJ</i>                                  | This work    |
| MD0446  | SL1344 <i>igaA1 zhf-6311::Tn10dTet rcsB70::Tn10dCm ugd-9228::MudJ</i>         | This work    |
| MD0472  | SL1344 <i>rcsA51::MudQ ugd-9228::MudJ</i>                                     | This work    |
| MD0474  | SL1344 <i>igaA1 zhf-6311::Tn10dTet rcsA51::MudQ ugd-9228::MudJ</i>            | This work    |
| MD0402  | SL1344 <i>phoP7953::Tn10 ugd-9228::MudJ</i>                                   | This work    |
| MD0931  | SL1344 <i>pmrA1::cat ugd-9228::MudJ</i>                                       | This work    |
| MD0451  | SL1344 <i>igaA1 phoP7953::Tn10 ugd-9228::MudJ</i>                             | This work    |
| MD0902  | SL1344 <i>igaA1 zhf-6311::Tn10dTet pmrA1::cat ugd-9228::MudJ</i>              | This work    |
| MD0496  | SL1344 <i>igaA1 phoP7953::Tn10 pmrA1::cat ugd-9228::MudJ</i>                  | This work    |
| MD0500  | SL1344 <i>igaA1 phoP7953::Tn10 rcsB70::Tn10dCm ugd-9228::MudJ</i>             | This work    |
| MD0498  | SL1344 <i>igaA1 phoP7953::Tn10 rcsA51::MudQ ugd-9228::MudJ</i>                | This work    |
| MD0927  | SL1344 <i>tolB::Tn10d-Cm ugd-9228::MudJ</i>                                   | This work    |
| EG11561 | SL1344 <i>pbgP1::MudJ</i>                                                     | E.A.Groisman |

|         |                                                                            |               |
|---------|----------------------------------------------------------------------------|---------------|
| MD0057  | SL1344 <i>igaA1 zhf-6311::Tn10dTet pbgP1::MudJ</i>                         | This work     |
| MD0447  | SL1344 <i>igaA1 zhf-6311::Tn10dTet rcsB70::Tn10dCm pbgP1::MudJ</i>         | This work     |
| MD0475  | SL1344 <i>igaA1 zhf-6311::Tn10dTet rcsA51::MudQ pbgP1::MudJ</i>            | This work     |
| MD0407  | SL1344 <i>phoP7953::Tn10 pbgP1::MudJ</i>                                   | This work     |
| MD0933  | SL1344 <i>rpoS::Ω-Amp<sup>r</sup> pbgP1::MudJ</i>                          | This work     |
| MD0923  | SL1344 <i>igaA1 zhf-6311::Tn10dTet rpoS::Ω-Amp<sup>r</sup> pbgP1::MudJ</i> | This work     |
| SV4407  | SL1344 <i>gmm-21::MudJ</i>                                                 | (2)           |
| MD0099  | SL1344 <i>igaA1 gmm-21::MudJ</i>                                           | This work     |
| MD0471  | SL1344 <i>phoP7953::Tn10 gmm::MudJ</i>                                     | This work     |
| MD0906  | SL1344 <i>pmrA1::cat gmm::MudJ</i>                                         | This work     |
| MD0904  | SL1344 <i>igaA1 zhf-6311::Tn10dTet pmrA1::cat gmm::MudJ</i>                | This work     |
| MD0905  | SL1344 <i>igaA1 phoP7953::Tn10 gmm::MudJ</i>                               | This work     |
| EG11566 | SL1344 <i>pbgX::MudJ</i>                                                   | E.A. Groisman |
| EG11557 | SL1344 <i>pbgD::MudJ</i>                                                   | E.A. Groisman |
| EG11558 | SL1344 <i>mgtC::MudJ</i>                                                   | E.A. Groisman |
| EG11559 | SL1344 <i>psiD::MudJ</i>                                                   | E.A. Groisman |
| EG11560 | SL1344 <i>pbgO::MudJ</i>                                                   | E.A. Groisman |
| EG11562 | SL1344 <i>pcgF::MudJ</i>                                                   | E.A. Groisman |
| EG11563 | SL1344 <i>pcgG::MudJ</i>                                                   | E.A. Groisman |
| EG11565 | SL1344 <i>pcgL::MudJ</i>                                                   | E.A. Groisman |
| MD0066  | SL1344 <i>zzz::MudJ</i>                                                    | This work     |
| MD0062  | SL1344 <i>igaA1 zhf-6311::Tn10dTet pbgX::MudJ</i>                          | This work     |

|        |                                                                              |           |
|--------|------------------------------------------------------------------------------|-----------|
| MD0053 | SL1344 <i>igaA1 zhf-6311::Tn10dTet pbgD::MudJ</i>                            | This work |
| MD0054 | SL1344 <i>igaA1 zhf-6311::Tn10dTet mgtC::MudJ</i>                            | This work |
| MD0055 | SL1344 <i>igaA1 zhf-6311::Tn10dTet psiD::MudJ</i>                            | This work |
| MD0056 | SL1344 <i>igaA1 zhf-6311::Tn10dTet pbgO::MudJ</i>                            | This work |
| MD0058 | SL1344 <i>igaA1 zhf-6311::Tn10dTet pcgF::MudJ</i>                            | This work |
| MD0059 | SL1344 <i>igaA1 zhf-6311::Tn10dTet pcgG::MudJ</i>                            | This work |
| MD0061 | SL1344 <i>igaA1 zhf-6311::Tn10dTet pcgL::MudJ</i>                            | This work |
| MD0413 | SL1344 <i>igaA1 zhf-6311::Tn10dTet xxx::MudJ</i>                             | This work |
| MD0412 | SL1344 <i>phoP7953::Tn10 pbgX::MudJ</i>                                      | This work |
| MD0403 | SL1344 <i>phoP7953::Tn10 pbgD::MudJ</i>                                      | This work |
| MD0404 | SL1344 <i>phoP7953::Tn10 mgtC::MudJ</i>                                      | This work |
| MD0405 | SL1344 <i>phoP7953::Tn10 psiD::MudJ</i>                                      | This work |
| MD0406 | SL1344 <i>phoP7953::Tn10 pbgO::MudJ</i>                                      | This work |
| MD0408 | SL1344 <i>phoP7953::Tn10 pcgF::MudJ</i>                                      | This work |
| MD0409 | SL1344 <i>phoP7953::Tn10 pcgG::MudJ</i>                                      | This work |
| MD0411 | SL1344 <i>phoP7953::Tn10 pcgL::MudJ</i>                                      | This work |
| MD0414 | SL1344 <i>phoP7953::Tn10 xxx::MudJ</i>                                       | This work |
| MD0918 | SL1344 <i>phoP5170::MudJ pIZ988</i>                                          | This work |
| MD0919 | SL1344 <i>igaA1 zhf-6311::Tn10dTet phoP5170::MudJ pIZ988</i>                 | This work |
| MD0920 | SL1344 <i>igaA1 zhf-6311::Tn10dTet phoP5170::MudJ rcsA51::MudQ pIZ988</i>    | This work |
| MD0921 | SL1344 <i>igaA1 zhf-6311::Tn10dTet phoP5170::MudJ rcsB70::Tn10dCm pIZ988</i> | This work |
| MD0935 | SL1344 <i>phoP5170::MudJ rpoS::cat pIZ988</i>                                | This work |

|          |                                                                                 |           |
|----------|---------------------------------------------------------------------------------|-----------|
| MD0936   | SL1344 <i>igaA1 zhf-6311::Tn10dTet phoP5170::MudJ rpoS::cat</i> pIZ988          | This work |
| 14028s   | wild type, mouse virulent isolate                                               | (3)       |
| MD0928   | 14028s <i>ugd-9228::MudJ</i>                                                    | This work |
| EG13354  | 14028s <i>tolB::Tn10d-Cm</i>                                                    | (6)       |
| MD0926   | 14028s <i>tolB::Tn10d-Cm ugd-9228::MudJ</i>                                     | This work |
| MD0929   | 14028s <i>igaA1 zhf-6311::Tn10dTet</i>                                          | This work |
| MD0930   | 14028s <i>igaA1 zhf-6311::Tn10dTet ugd-9228::MudJ</i>                           | This work |
| Plasmids |                                                                                 |           |
| pMM40    | <i>lacI<sup>q</sup></i> , ColE1                                                 | (5)       |
| pIZ988   | <i>phoP-phoQ</i> region from strain SL1344 cloned in <i>EcoRI</i> site of pMM40 | D.A. Cano |

---

## REFERENCES

1. **Cano, D. A., G. Dominguez-Bernal, A. Tierrez, F. García-Del Portillo, and J. Casadesus.** 2002. Regulation of capsule synthesis and cell motility in *Salmonella enterica* by the essential gene *igaA*. *Genetics* **162**:1513-1523.
2. **Cano, D. A., M. Martinez-Moya, M. G. Pucciarelli, E. A. Groisman, J. Casadesus, and F. García-Del Portillo.** 2001. *Salmonella enterica* serovar Typhimurium response involved in attenuation of pathogen intracellular proliferation. *Infect Immun.* **69**:6463-6474.
3. **Fields, P. I., R. V. Swanson, C. G. Haidaris, and F. Heffron.** 1986. Mutants of *Salmonella typhimurium* that cannot survive within the macrophage are avirulent. *Proc. Natl. Acad. Sci. U S A* **83**:5189-5193.
4. **Hoiseh, S. K., and B. A. Stocker.** 1981. Aromatic-dependent *Salmonella typhimurium* are non-virulent and effective as live vaccines. *Nature* **291**:238-239.

5. **Kleiner, D., W. Paul, and M. J. Merrick.** 1988. Construction of multicopy expression vectors for regulated over-production of proteins in *Klebsiella pneumoniae* and other enteric bacteria. *J. Gen. Microbiol.* **134**:1779-1784.
6. **Mousslim, C., and E. A. Groisman.** 2003. Control of the *Salmonella ugd* gene by three two-component regulatory systems. *Mol. Microbiol.* **47**:335-344.
7. **O'Neal, C. R., W. M. Gabriel, A. K. Turk, S. J. Libby, F. C. Fang, and M. P. Spector.** 1994. RpoS is necessary for both the positive and negative regulation of starvation survival genes during phosphate, carbon, and nitrogen starvation in *Salmonella typhimurium*. *J. Bacteriol.* **176**:4610-4616.
